# Supplementary material
Source: MDPI journal article supplement (https://www.mdpi.com/2624-8549/5/1/7)
Supplement: s1 [file s1 › chemistry-2098938-supplementary.pdf]

## Supporting Information

### Synthesis, Structural, Magnetic & Computational Studies of a One-Dimensional Ferromagnetic Cu(II) Chain Assembled From a New Schiff-Base Ligand

Anne Worrell<sup>a</sup>, Gabriele Delle Monache<sup>a</sup>, Mark M. Turnbull<sup>b</sup>, Jeremy Rawson<sup>c</sup>, Theocharis C. Stamatatos<sup>d,\*</sup>, Melanie Pilkington<sup>a,\*</sup>

<sup>a</sup> *Department of Chemistry, Brock University, 1812 Sir Isaac Brock Way, St. Catharines, ON L2S3A1, Canada*

<sup>b</sup> *Carlson School of Chemistry and Biochemistry, Clark University, 950 Main St. Worcester, MA 01610, USA*

<sup>c</sup> *Department of Chemistry and Biochemistry, University of Windsor, 401 Sunset Ave, Windsor, ON N9B3P4, Canada*

<sup>d</sup> *Department of Chemistry, University of Patras, 265 04 Patras, Greece*

#### AUTHOR INFORMATION

\***Email:** mpilkington@brocku.ca

\***Email:** thstama@upatras.gr

## **Table of Contents**

|                                                                                                             |   |
|-------------------------------------------------------------------------------------------------------------|---|
| Figure S1: Structural model of <b>1</b> employed for the DFT calculations.....                              |   |
| Figure S2. IR spectra obtained for the ( <b>nancH<sub>2</sub></b> ) ligand .....                            | 3 |
| Figure S3. Mass spectrum of the ( <b>nancH<sub>2</sub></b> ) ligand in a 1:1 (DCM/MeOH) solvent mixture.... | 4 |
| Figure S4. IR spectrum for the ( <b>nancH<sub>2</sub></b> ) ligand.....                                     | 4 |
| Figure S5. Temperature dependence of $1/\chi_m$ for <b>1</b> .....                                          | 5 |
| Figure S6. Field/Temperature dependence of M for <b>1</b> .....                                             | 5 |
| Figure S7. <sup>1</sup> H NMR spectrum for ( <b>nancH<sub>2</sub></b> ) in DMSO d <sub>6</sub> .....        | 6 |
| Figure S8. <sup>13</sup> C NMR spectrum for ( <b>nancH<sub>2</sub></b> ) in DMSO-d <sub>6</sub> .....       | 7 |

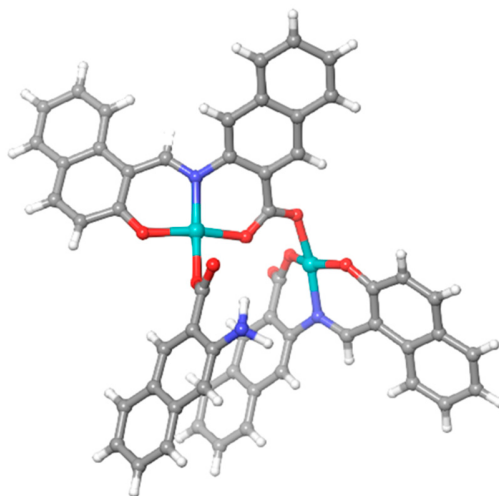

**Figure S1.** Structural model of **1** employed for the DFT calculations to elucidate the theoretical value of the magnetic exchange parameter  $J$ . Colour scheme:  $\text{Cu}^{\text{II}}$ , cyan; N, blue; O, red; C, grey; H, white.

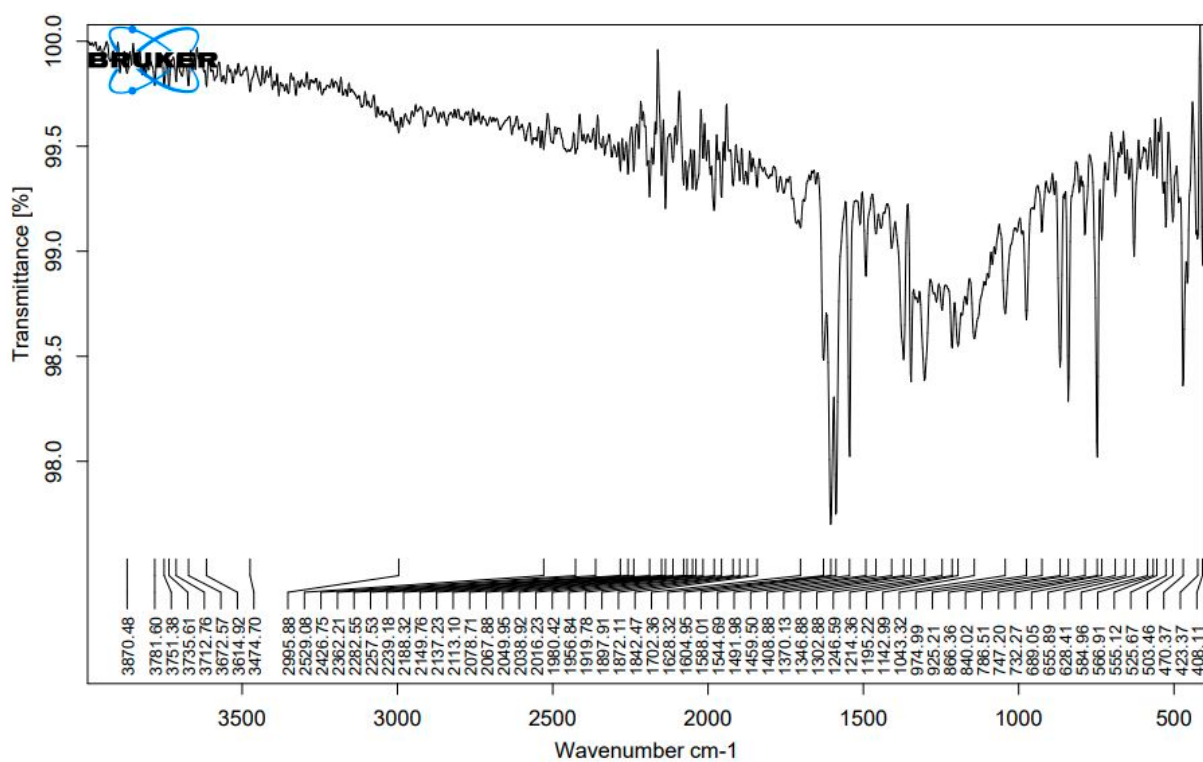

**Figure S2.** IR spectra for the (**nancH<sub>2</sub>**) ligand.

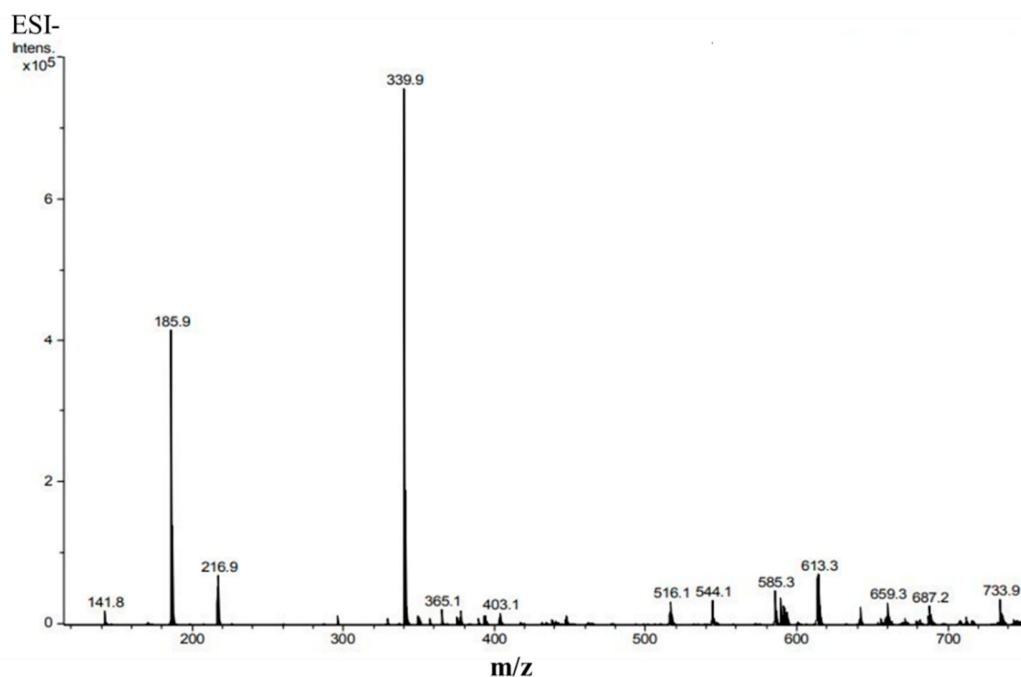

**Figure S3.** ESI mass spectrum of the (**nanch<sub>2</sub>**) ligand, in a 1:1 (DCM/MeOH) solvent mixture.

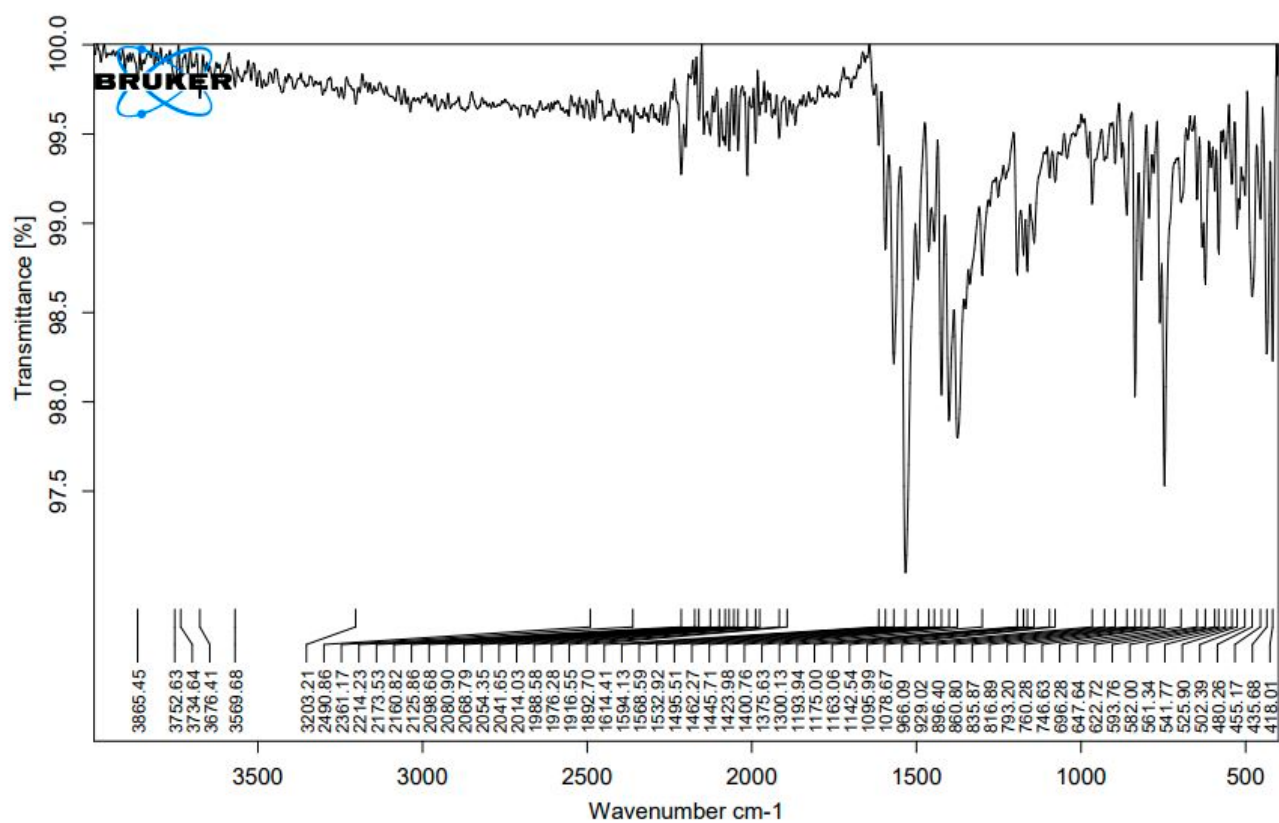

**Figure S4.** IR spectrum of complex **1**.

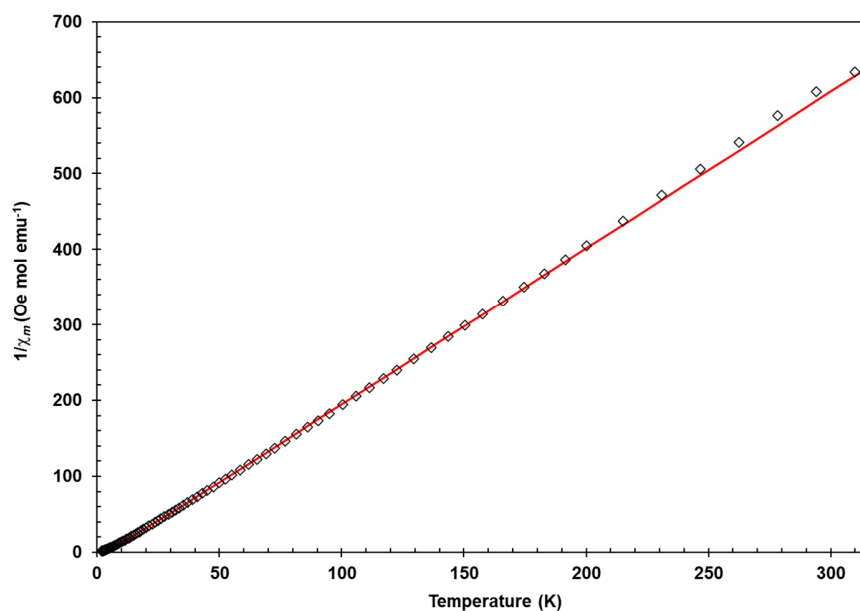

**Figure S5.** Temperature dependence of  $1/\chi_m$  for **1**. The red solid line represents the best fit to the uniform Heisenberg 1-D-ferromagnetic chain model.

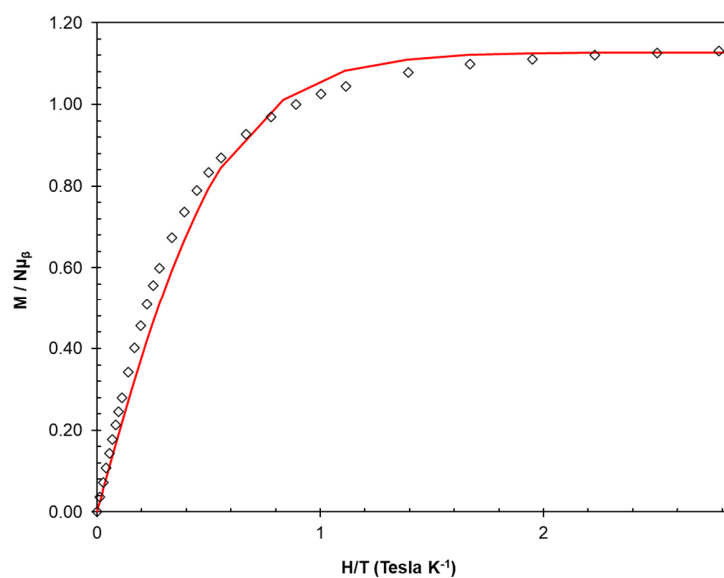

**Figure S6.** Field/Temperature dependence of  $M$  for **1**. The red solid line represents the best fit to the Brillouin function.

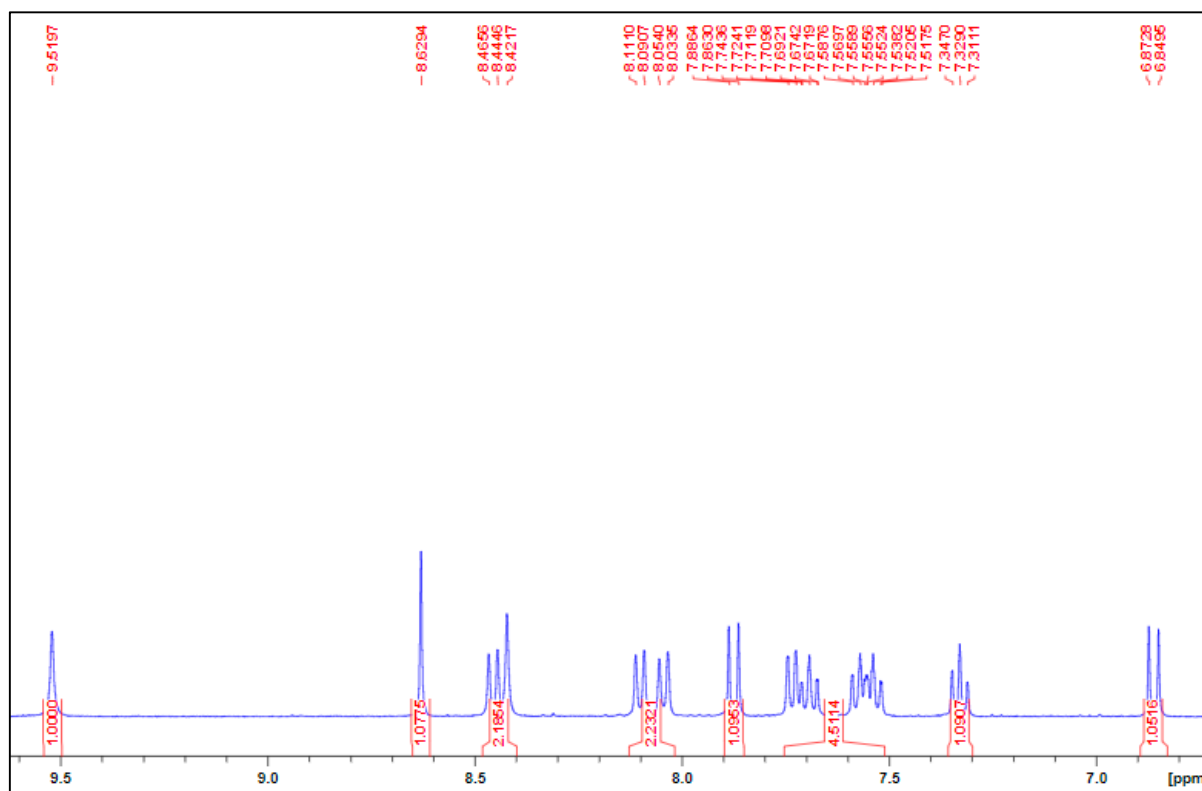

**Figure S7.**  $^1\text{H}$  NMR spectrum of the (nancH<sub>2</sub>) ligand in DMSO-d<sub>6</sub>.

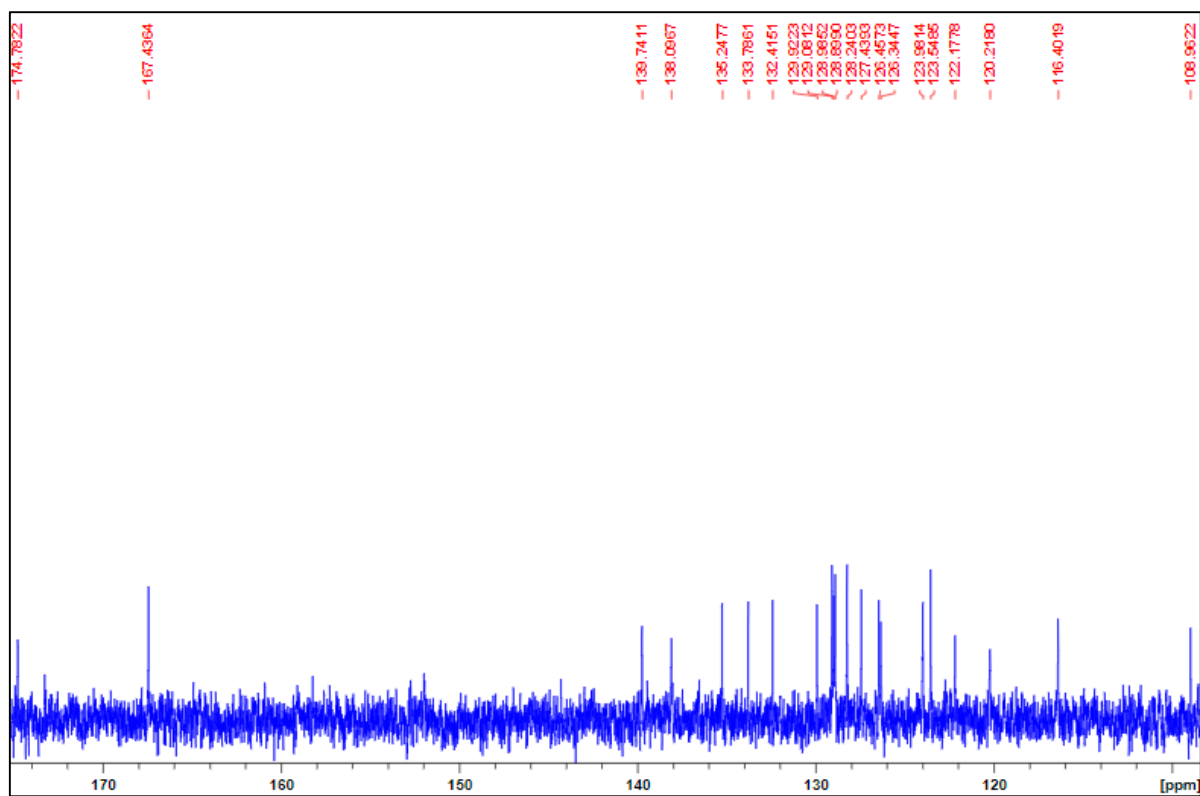

**Figure S8.**  $^{13}\text{C}$  NMR spectrum of the (**nancH<sub>2</sub>**) ligand in DMSO- $d_6$ .
